# Supplementary material
Source: Springer Nature journal article supplement (https://www.springermedizin.de/resource/supplementary/12986_2011_352_MOESM3_ESM.pdf/25655900)

## Ketosis reached

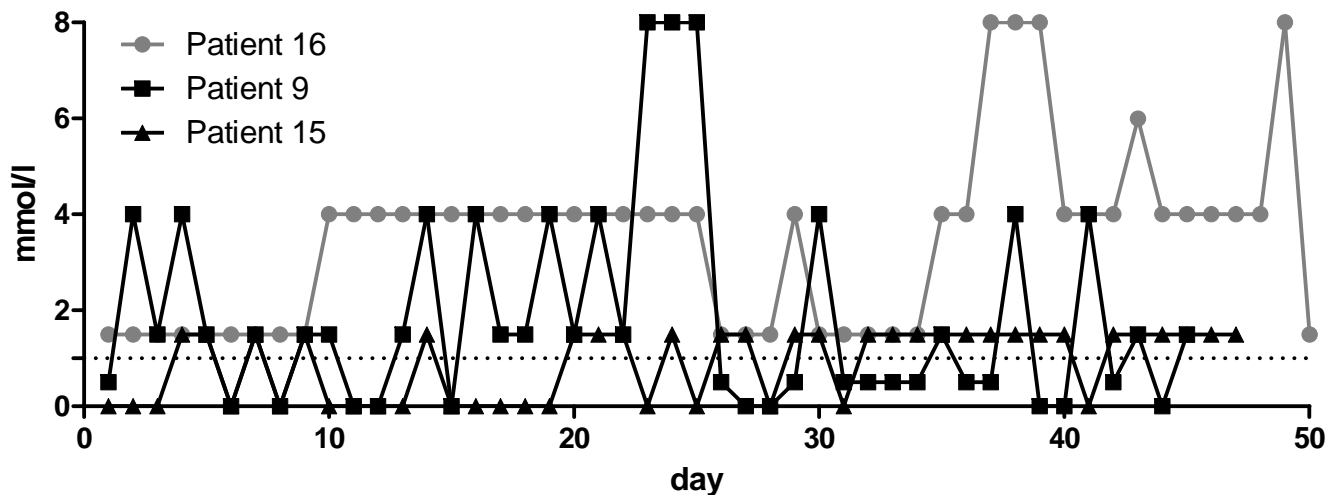

## Ketosis not reached

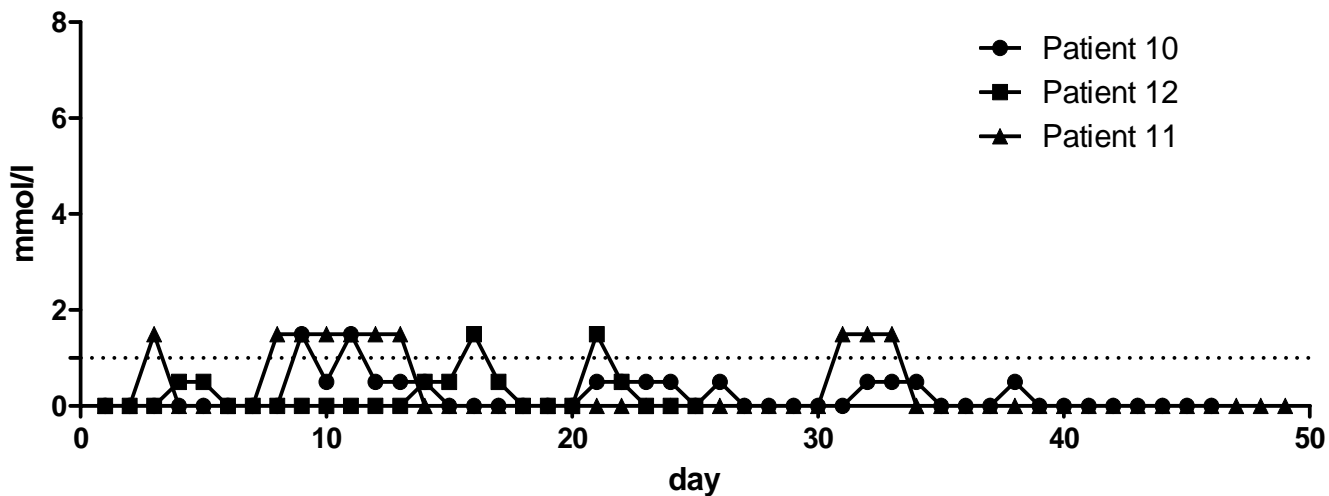

Supplement: MOESM3 [file 25655900]
